# Supplementary material
Source: PubMed Central journal article supplement (PMC2792738)
Supplement: NIHMS159482-supplement-Additional_Tables_and_Figures.pdf [file NIHMS159482-supplement-Additional_Tables_and_Figures.pdf]

**Table 1. Maternal Infections and Stillbirths**

| Organism                      | Maternal Disease      | Comment                                                                                                                        |
|-------------------------------|-----------------------|--------------------------------------------------------------------------------------------------------------------------------|
| Spirochetes                   |                       |                                                                                                                                |
| <i>Treponema pallidum</i>     | Syphilis              | Major cause of stillbirth when maternal prevalence is high                                                                     |
| <i>Borrelia burgdorferi</i>   | Lyme disease          | Tick-borne infection and a confirmed, but not common, cause of stillbirth                                                      |
| <i>Borrelia recurrentis</i>   | Relapsing fever       | Tick-borne infection common in the western U.S. and a confirmed but rare cause of stillbirth                                   |
| <i>Borrelia duttonii</i>      | Relapsing Fever       | Tick-borne infection common in Sub-Saharan Africa and probably an important cause of stillbirth                                |
| <i>Leptospira interrogans</i> | Leptospirosis         | Confirmed as cause of stillbirth but not common                                                                                |
| Protozoa                      |                       |                                                                                                                                |
| <i>Trypanosoma brucei</i>     | Trypanosomiasis       | Carried by tsetse fly; a likely cause of stillbirth in southern Africa, but overall contribution unknown                       |
| <i>Trypanosoma cruzi</i>      | Chagas disease        | Carried by the Triatomine (kissing bug) and a confirmed cause of stillbirth in South America, but overall contribution unknown |
| <i>Plasmodium falciparum</i>  | Malaria               | Carried by mosquitoes and likely an important cause of stillbirth in newly endemic areas or in newly infected women            |
| <i>Plasmodium vivax</i>       | Malaria               | Carried by mosquitoes and a possible cause of stillbirth but likely less important than with <i>Plasmodium falciparum</i>      |
| <i>Toxoplasmosis gondii</i>   | Toxoplasmosis         | Confirmed as a rare cause of stillbirth                                                                                        |
| <i>Coxiella burnetti</i>      | Q fever               | Confirmed as cause of stillbirth but of unknown importance                                                                     |
| Viruses                       |                       |                                                                                                                                |
| Parvovirus (B19)              | Erythema infectiosum  | Confirmed as cause of stillbirth and likely is the most common viral etiologic agent                                           |
| Coxsackie A and B             | Various presentations | Confirmed as causes of stillbirth and may be an important contributor to overall stillbirth rate                               |
| Echovirus                     | Various presentations | Confirmed as cause of stillbirth but of unknown                                                                                |

Reddy UM, Goldenberg R, Silver R, Smith GCS, Pauli RM, Wapner RJ. Stillbirth classification: developing an international consensus for research. *Obstet Gynecol* 2009;114.

|                                    |                                                        |                                                                                                                 |
|------------------------------------|--------------------------------------------------------|-----------------------------------------------------------------------------------------------------------------|
|                                    |                                                        | importance                                                                                                      |
| Enterovirus                        | Various presentations                                  | Confirmed as cause of stillbirth but of unknown importance                                                      |
| Hepatitis E virus                  | Fulminant hepatic failure                              | Probable cause of stillbirth, especially in geographic areas with epidemic outbreaks                            |
| Polio virus                        | Polio                                                  | Historically likely cause of stillbirth but since routine vaccination is rarely seen in developed countries     |
| Varicella zoster                   | Chickenpox                                             | Confirmed as a rare cause of stillbirth but with routine vaccination almost never seen                          |
| Rubella                            | German measles                                         | Confirmed as a cause of stillbirth but rarely reported as a cause of stillbirth in developed countries          |
| Mumps                              | Parotitis                                              | Possibly a cause of stillbirth historically but rarely reported as a cause of stillbirth in developed countries |
| Rubeola                            | Measles                                                | A probable cause of stillbirth historically but rarely reported as a cause of stillbirth in developed countries |
| Cytomegalovirus                    | Generally asymptomatic in adults                       | Reported as a cause of stillbirth in case reports but overall contribution is unknown                           |
| Variola                            | Smallpox                                               | Historically a cause of stillbirth but with vaccination no longer seen                                          |
| Ljungan virus                      | Diabetes, neurological disease, myocarditis and deaths | Carried by wild rodents, it is associated with several cases of stillbirth in a single report                   |
| Dengue virus                       | Dengue fever                                           | Carried by mosquitoes and confirmed as a cause of stillbirth                                                    |
| Lymphocytic choriomeningitis virus | Lymphocytic choriomeningitis                           | A possible cause of stillbirth but of unknown importance                                                        |
| Human immunodeficiency virus       | Acquired immunodeficiency syndrome                     | Associated with stillbirth but not likely causative                                                             |
| Bacteria                           |                                                        |                                                                                                                 |
| <i>E coli</i>                      | Generally asymptomatic                                 | Confirmed as a cause of stillbirth and is probably the most common organism associated with stillbirth          |
| group B <i>Streptococcus</i>       | Generally asymptomatic                                 | Confirmed as common cause of stillbirth                                                                         |

Reddy UM, Goldenberg R, Silver R, Smith GCS, Pauli RM, Wapner RJ. Stillbirth classification: developing an international consensus for research. *Obstet Gynecol* 2009;114.

|                                                                                                                                                                       |                        |                                                                            |
|-----------------------------------------------------------------------------------------------------------------------------------------------------------------------|------------------------|----------------------------------------------------------------------------|
| <i>Klebsiella</i>                                                                                                                                                     | Generally asymptomatic | Confirmed as a common cause of stillbirth                                  |
| <i>Enterococcus</i>                                                                                                                                                   | Generally asymptomatic | Confirmed as a cause of stillbirth                                         |
| <i>Ureaplasma urealyticum</i>                                                                                                                                         | Generally asymptomatic | Confirmed as a cause of stillbirth                                         |
| <i>Mycoplasma hominus</i>                                                                                                                                             | Generally asymptomatic | Confirmed as a cause of stillbirth                                         |
| Bacteroidaceae                                                                                                                                                        | Generally asymptomatic | Confirmed as a cause of stillbirth                                         |
| <i>Listeria monocytogenes</i>                                                                                                                                         | Listeriosis            | Confirmed as a cause of stillbirth; generally transmitted transplacentally |
| Other bacterial infections (including Tularemia Brucellosis, Clostridia, Typhoid, Anthrax, Streptococcus pseudoporcinus, Agrobacterium radiobacter, Pseudomonas, etc) |                        | Each organism has been implicated as causal for stillbirth by case reports |
| <i>Chlamydia trachomatis</i>                                                                                                                                          | Pelvic infection       | Suggested as cause of stillbirth by case reports                           |
| <i>Neisseria gonorrhoeae</i>                                                                                                                                          | Pelvic infection       | Suggested as cause of stillbirth by case reports                           |
| Fungi                                                                                                                                                                 |                        |                                                                            |
| <i>Candida albicans</i>                                                                                                                                               | Thrush, vaginitis      | Confirmed as cause of stillbirth by case reports                           |

Updated from Goldenberg RL, Thompson C. The infectious origins of stillbirth. Am J Obstet Gynecol 2003;189:861–73.

**Table 2. Maternal Medical Disease: Current Stillbirth Rates**

| Condition                               | Estimated Stillbirth Rate * |
|-----------------------------------------|-----------------------------|
| All pregnancies                         | 6-7/1,000                   |
| Hypertensive disorders                  |                             |
| Chronic hypertension                    | 5-25/1,000                  |
| Superimposed preeclampsia               | 52/1,000                    |
| PIH/mild preeclampsia                   | 9/1,000                     |
| Severe preeclampsia                     | 21/1,000                    |
| eclampsia                               | 18-48/1,000                 |
| HELLP syndrome                          | 51/1,000                    |
| Diabetes mellitus                       |                             |
| Gestational diabetes                    | 5-10/1,000                  |
| Type 1 diabetes                         | 6-10/1,000                  |
| Type 2 diabetes                         | 35/1,000                    |
| Obesity                                 | 15-20/1,000                 |
| Systemic lupus erythematosus            | 40-150/1,000                |
| Chronic renal disease                   |                             |
| Mild renal insufficiency                | 15/1,000                    |
| Moderate and severe renal insufficiency | 32-200/1,000                |
| Thyroid disorders                       |                             |
| Stable treated hyperthyroidism          | 0-36/1,000                  |
| Uncontrolled thyrotoxicosis             | 100-156/1,000               |
| Subclinical hypothyroidism              | 0-15/1,000                  |
| Overt hypothyroidism                    | 15-125/1,000                |
| Cholestasis of pregnancy                | 12-30/1,000                 |

Reprinted from Simpson LL. Maternal Medical Disease: Risk of Antepartum Fetal Death. *Semin Perinatol* 2002;26:47; with permission from Elsevier.

Abbreviations: PIH, pregnancy induced hypertension; HELLP, hemolysis, elevated liver enzymes, low platelets.

\* Number of stillbirths at more than 20 weeks of gestation per 1,000 births in patients with the condition.

Reddy UM, Goldenberg R, Silver R, Smith GCS, Pauli RM, Wapner RJ. Stillbirth classification: developing an international consensus for research. *Obstet Gynecol* 2009;114.

**Table 3: The Ten Most Frequent Fetal Malformations Judged to Be Causal**

| <b>Cause of Death</b>                       | <b>Number</b> | <b>Stillbirth Cases, %</b> |
|---------------------------------------------|---------------|----------------------------|
| Trisomy 21 (Down syndrome)                  | 34            | 1.53                       |
| Jugulolymphatic obstruction (Sequence, NOS) | 32            | 1.45                       |
| Turner syndrome                             | 24            | 1.09                       |
| Twin-twin transfusion                       | 24            | 1.09                       |
| Anencephaly                                 | 22            | 1.0                        |
| Trisomy 18                                  | 18            | 0.81                       |
| Amnion disruption sequence                  | 13            | 0.59                       |
| Lower mesodermal defects                    | 11            | 0.50                       |
| Idiopathic nonimmune fetal hydrops          | 11            | 0.50                       |
| Trisomy 13                                  | 9             | 0.41                       |

NOS, not otherwise specified.

Numbers are from Wisconsin Stillbirth Service Program data for 1983-2007. Total cases assessed were 2,211, among which 544 were identified as having fetal causes.

Table courtesy of Dr. Richard M. Pauli.

## Mechanism for Confined Placental Mosaicism

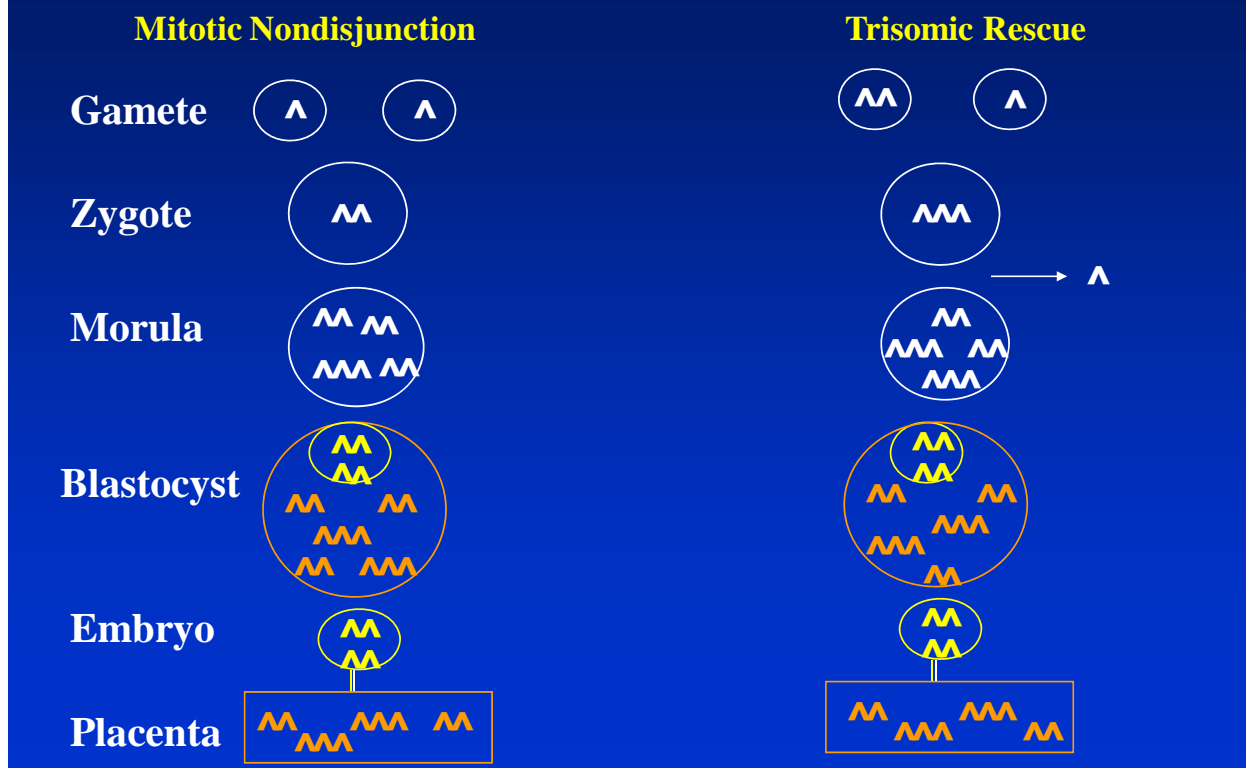

Figure 3: Mechanism for confined placental mosaicism. This figure demonstrates two mechanisms capable of causing confined placental mosaicism. Mitotic nondisjunction early in embryo development may lead to a mosaic morula containing a normal and an aneuploid cell line. Alternatively, a meiotic error can lead to a trisomic embryo, many of which will result in a spontaneous miscarriage. However, a second error (anaphase lag) may occur, converting a trisomic cell to disomy. In both mechanisms the morula is mosaic. Subsequently, cells are then randomly distributed to various compartments. Aneuploid cells distributed to the inner cell mass will result in true fetal mosaicism. If the aneuploid cells are distributed exclusively to the extra fetal lineage confined placental mosaicism will occur. Figure courtesy of Dr. Ronald Wapner.

CUSTOMISED ANTENATAL GROWTH CHART v 7.5.1U (UK)

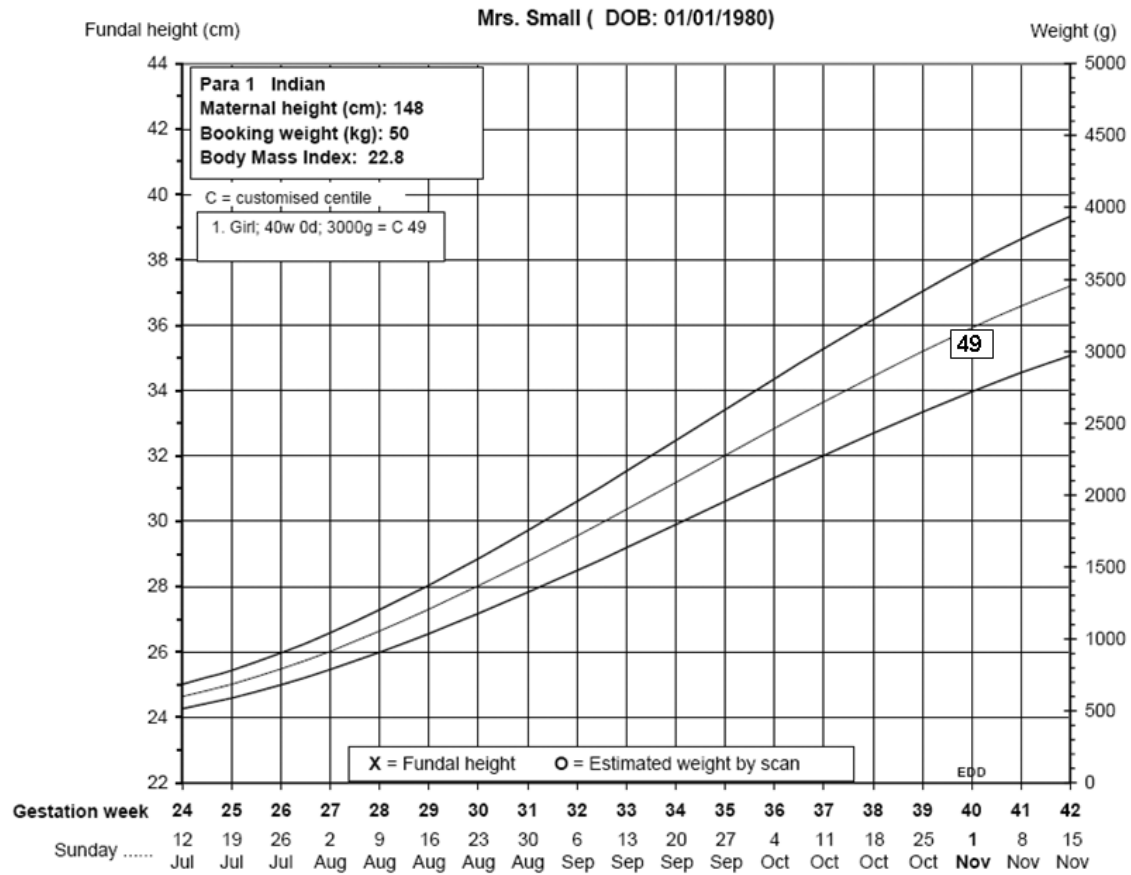

A

CUSTOMISED ANTENATAL GROWTH CHART v 7.5.1U (UK)

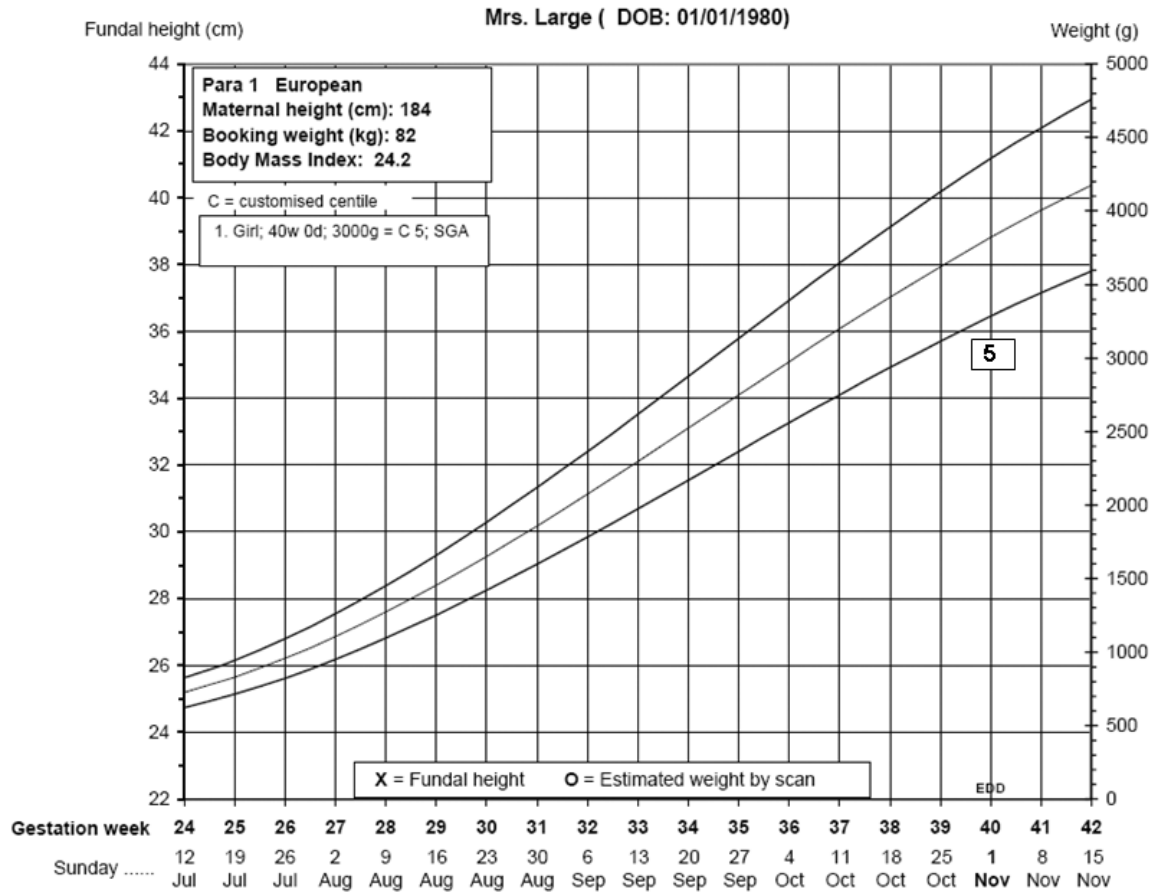

**B**

Figure 4: Examples of customized charts using GROW (Gestation Related Optimal Weight software v. 7.5.1, www.gestation.net). The charts can be used to plot previous baby weights and ultrasound estimated fetal weights in the current pregnancy (right Y axis) as well as fundal height measurements for serial assessment (left Y axis). The horizontal axis shows the day and month of the start of each week of gestation, calculated by the software on the basis of the estimated date of confinement. The 3 curves on the chart are the 50th centile and the 10th and 90th centile limits, representing the predicted range of optimal growth for each pregnancy, after adjustment for maternal height, weight, parity and ethnic origin. The pregnancy details are shown on the top left of the chart, with maternal height in cm, and maternal weight in kg. The example shows two mothers - ‘Mrs. Small’ and ‘Mrs. Large’, with two different sets of characteristics. A previously born baby girl weighing 3,000g at 40.0 weeks is illustrated as being of average size (49th birthweight centile) for Mrs. Small (A) , but small for gestational age (SGA, 5th centile) for Mrs. Large (Figure B). Figures courtesy of Dr. Jason Gardosi

Reddy UM, Goldenberg R, Silver R, Smith GCS, Pauli RM, Wapner RJ. Stillbirth classification: developing an international consensus for research. *Obstet Gynecol* 2009;114.



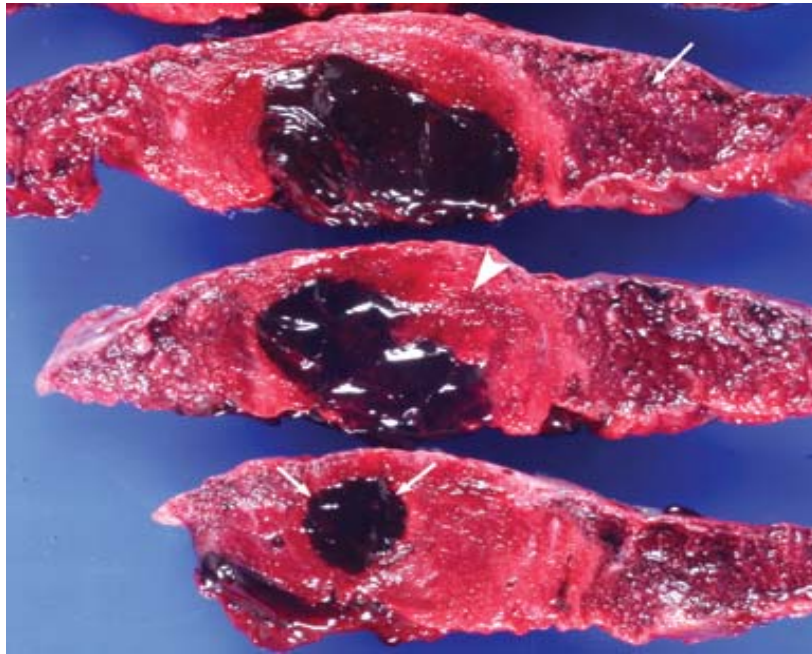

Figure 6: Abruptio placenta with parenchymal clot and surrounding infarcted parenchyma. Single arrow: Normal parenchyma. Arrowhead: Infarcted parenchyma surrounding the clot. Double arrow: Blood clot. Figure courtesy of Dr. Halit Pinar, Brown University.

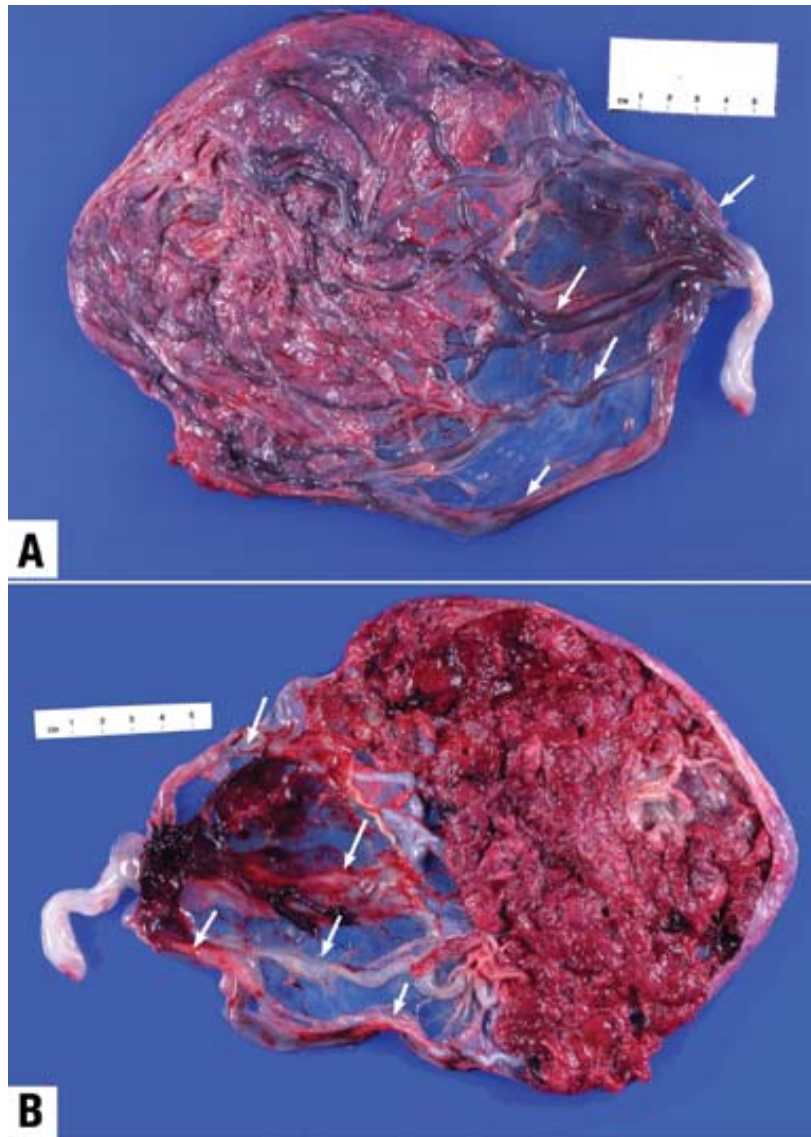

Figure 7: Velamentous insertion of the umbilical cord. A) Fetal surface. B) Maternal surface. Arrows show the fetal blood vessels travelling unprotected in the membranes before entering the placental disc. Figure courtesy of Dr. Halit Pinar, Brown University.

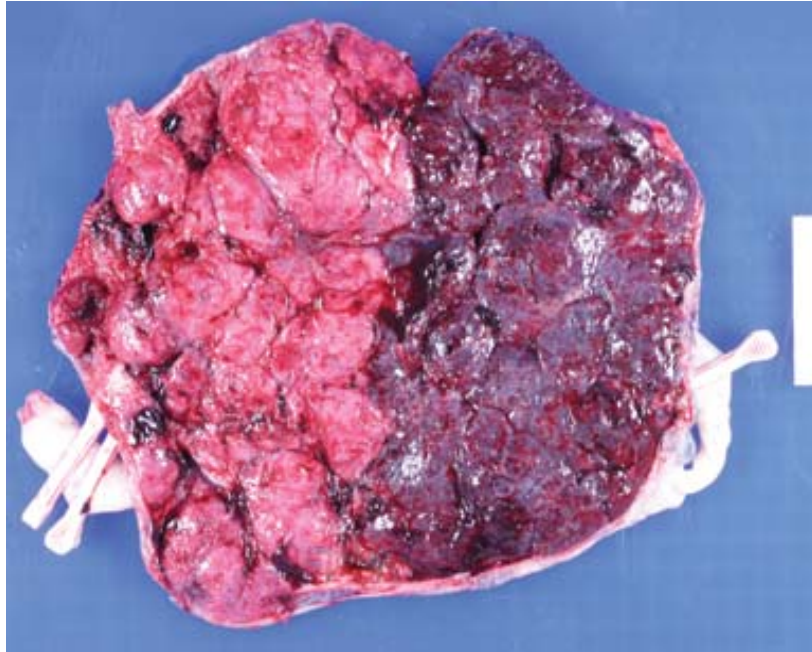

Figure 8: Placenta from a twin-twin transfusion syndrome. Figure courtesy of Dr. Halit Pinar, Brown University.
